# Supplementary material for: Modest Static Pressure Suppresses Columnar Epithelial Cell Growth in Association with Cell Shape and Cytoskeletal Modifications
Source: PubMed Central journal article supplement (PMC5723396; doi:10.3389/fphys.2017.00997), 2017-12-05
Supplement: DataSheet1.pdf [file DataSheet1.pdf]

**Figure S1**

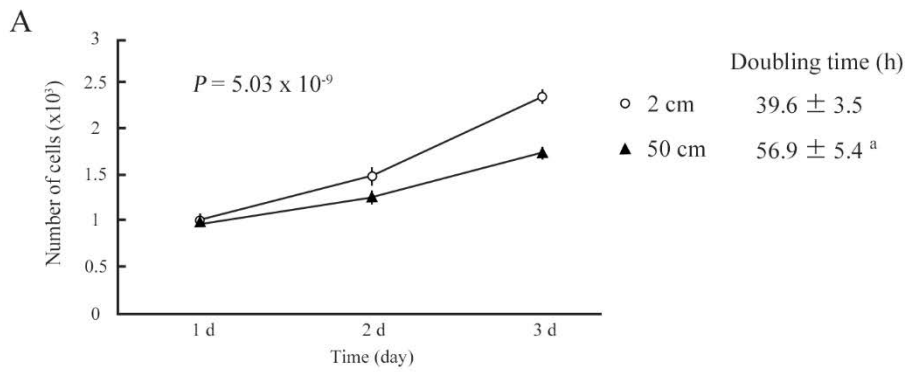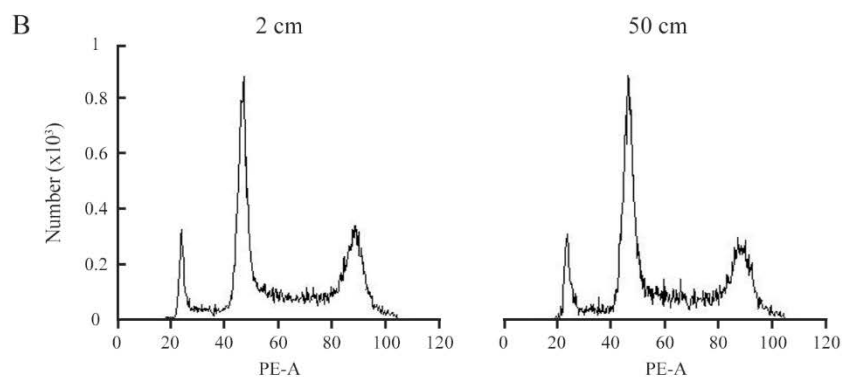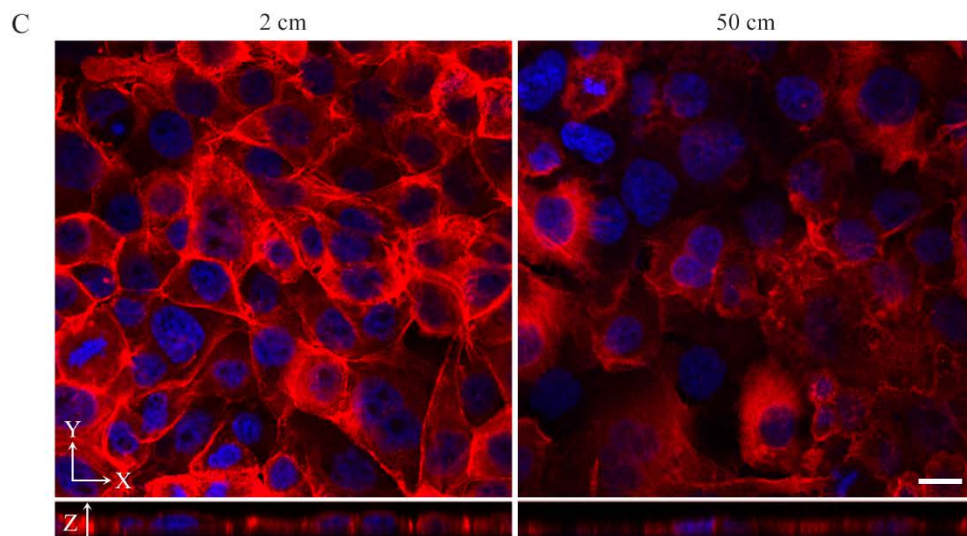

|                                       |                 |                   |
|---------------------------------------|-----------------|-------------------|
| Cell area (XY; $\mu\text{m}^2$ )      | $190 \pm 60$    | $260 \pm 90^b$    |
| Cell height (Z; $\mu\text{m}$ )       | $5.89 \pm 0.67$ | $3.40 \pm 0.63^a$ |
| Phalloidin intensity (arbitrary unit) |                 |                   |
| per XY plane                          | $5480 \pm 230$  | $1760 \pm 160^a$  |
| per cell                              | $41.1 \pm 1.7$  | $41.3 \pm 2.2$    |

D

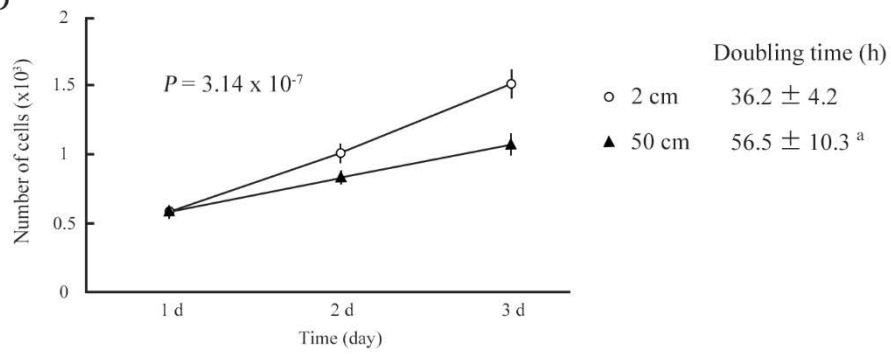

E

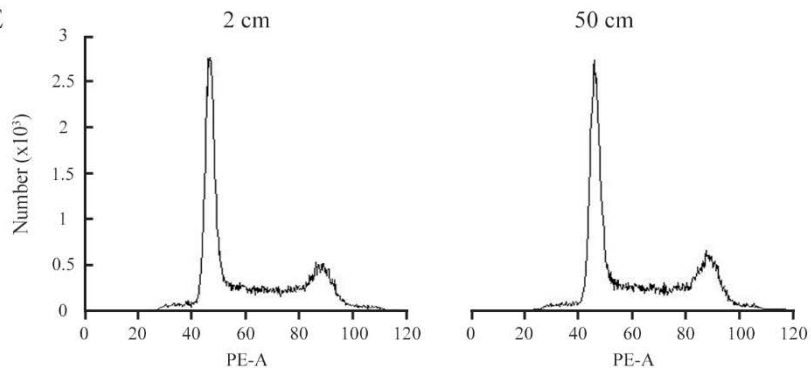

F

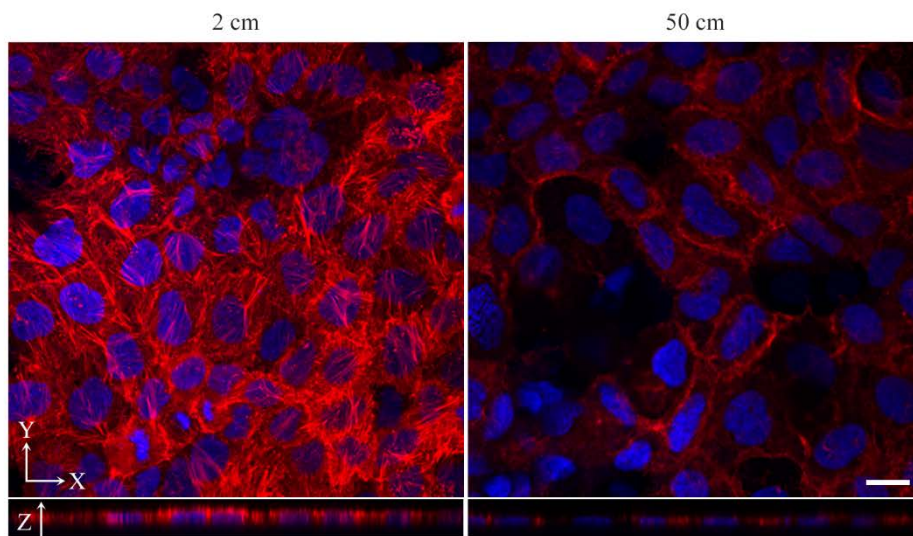

|                                       |                 |                   |
|---------------------------------------|-----------------|-------------------|
| Cell area (XY; $\mu\text{m}^2$ )      | $210 \pm 60$    | $280 \pm 70^b$    |
| Cell height (Z; $\mu\text{m}$ )       | $3.85 \pm 0.63$ | $3.17 \pm 0.67^b$ |
| Phalloidin intensity (arbitrary unit) |                 |                   |
| per XY plane                          | $1360 \pm 140$  | $510 \pm 50^a$    |
| per cell                              | $63.9 \pm 6.3$  | $62.4 \pm 3.8$    |

**Figure S1. Cell growth, cell cycle and cell morphological analyses of NCI-H441 and Caco-2 cells.**

NCI-H441 (A, B, and C) or Caco-2 (D, E, and F) cells were cultured on a semipermeable membrane in 2- or 50-cm-high culture medium for 3 days. (A and D) Cell numbers were counted every day, and the means were plotted with error bars indicating standard deviations ( $n = 3$  per group for each experiment). The time-course plots of cell numbers were analyzed by ANOVA; the  $P$ -values are shown. Cell doubling time (mean  $\pm$  standard deviation, hour) was calculated from five independent experiments. <sup>a</sup>  $P < 0.01$  by Student's  $t$ -test when compared with 2-cm-high-medium cultures. After 3 days of culture, cells were labeled with propidium iodide and analyzed by flow cytometry (B and E), or were stained with a mixture of phalloidin (red) and DAPI (blue) (C and F). Cell area and height and phalloidin intensity were measured by laser microscopic examinations. The total intensities of phalloidin per XY plane and cell were calculated. The former is the mean intensity of three XY planes around the middle of the Z-axis. The latter is calculated as follows: the mean phalloidin intensity of ten randomly selected ZX planes was multiplied by the area of the XY plane, then divided by the cell number. Shown below the photo panels are the measured values (mean  $\pm$  standard deviation). <sup>a</sup> and <sup>b</sup>,  $P \leq 0.01$  and  $0.05$ , respectively, by Student's  $t$ -test when compared with 2-cm-high-medium cultures. Scale bar =  $20 \mu\text{m}$ .

**Figure S2**

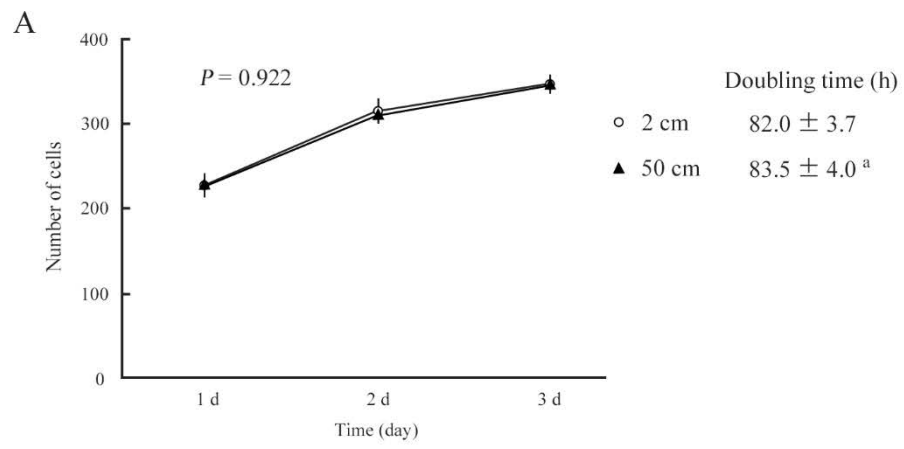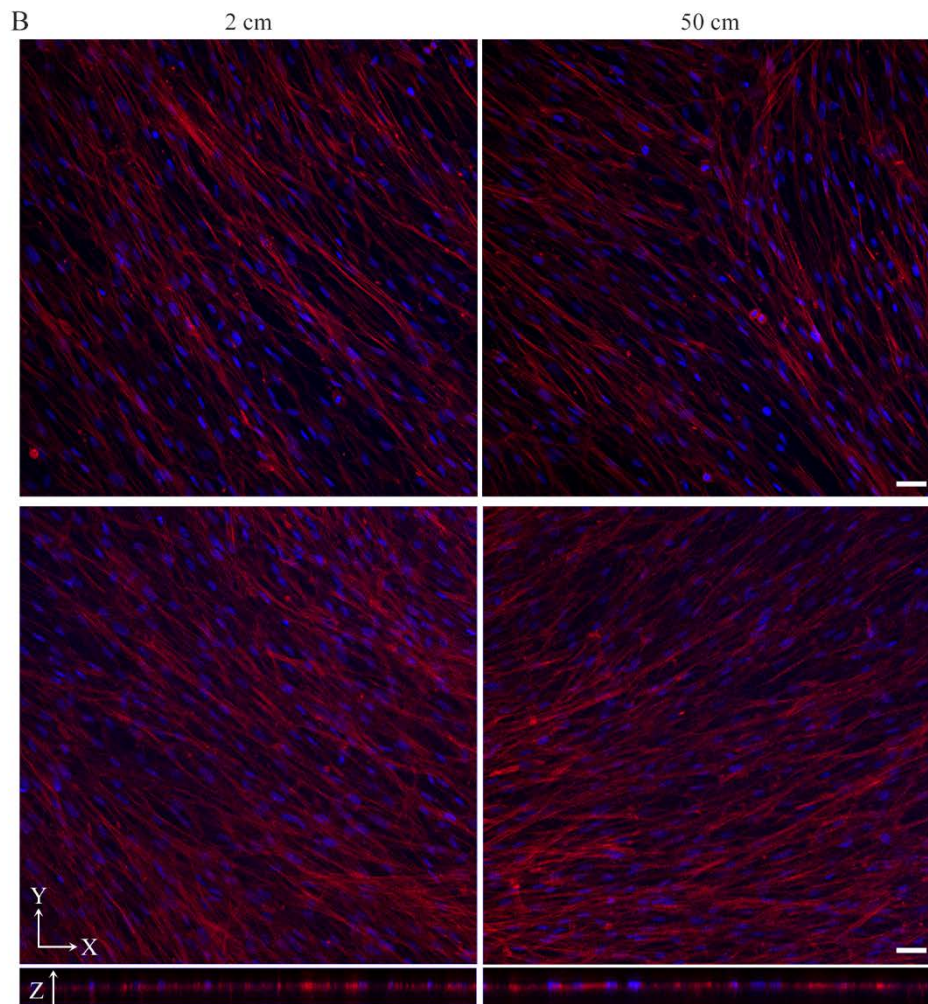

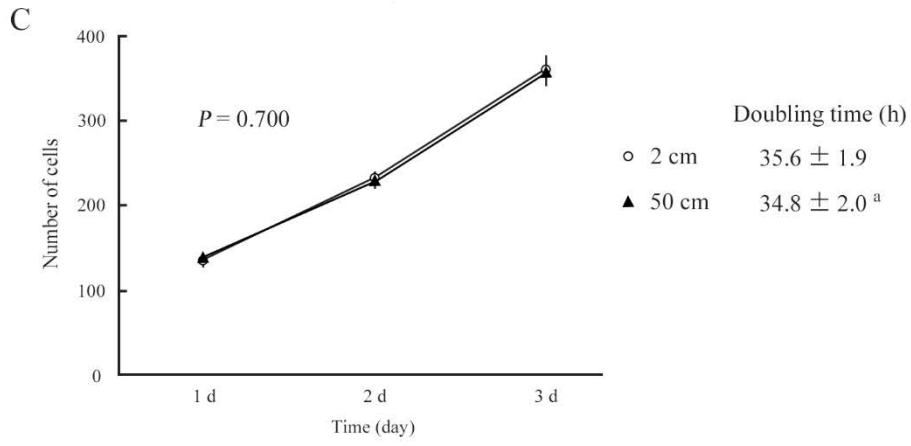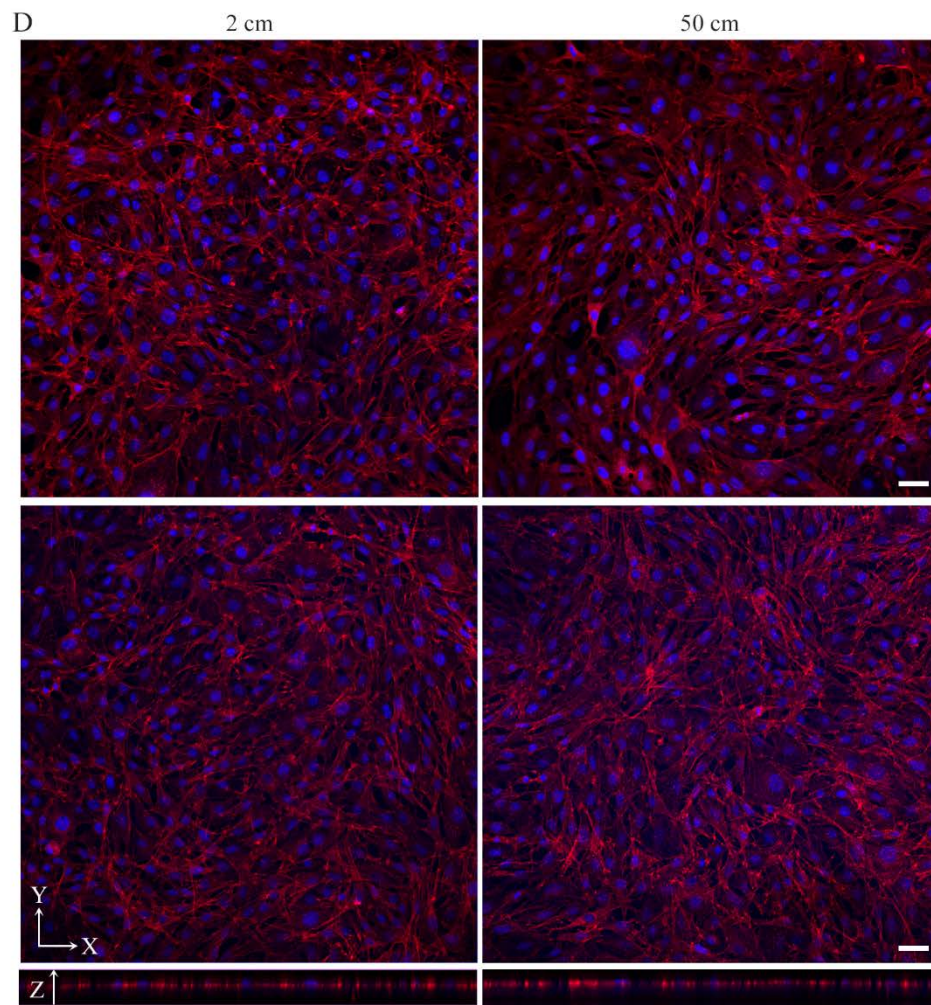

**Figure S2. Cell growth and cell morphological analyses of TIG-1 and NIH3T3 cells.**

TIG-1 (A and B) or NIH3T3 (C and D) cells were cultured on a semipermeable membrane in 2- or 50-cm-high culture medium for 3 days. (A and C) Cell numbers were counted every day, and the means were plotted with error bars indicating standard deviations ( $n = 3$  per group for each experiment). The time-course plots of cell numbers were analyzed by ANOVA; the  $P$ -values are shown. Cell doubling time (mean  $\pm$  standard deviation, hour) was calculated from five independent experiments. <sup>a</sup>  $P > 0.5$  by Student's  $t$ -test when compared with 2-cm-high-medium cultures. After 3 days of culture, cells were stained with a mixture of phalloidin (red) and DAPI (blue) (B and D). Scale bar = 20  $\mu\text{m}$ .

**Figure S3**

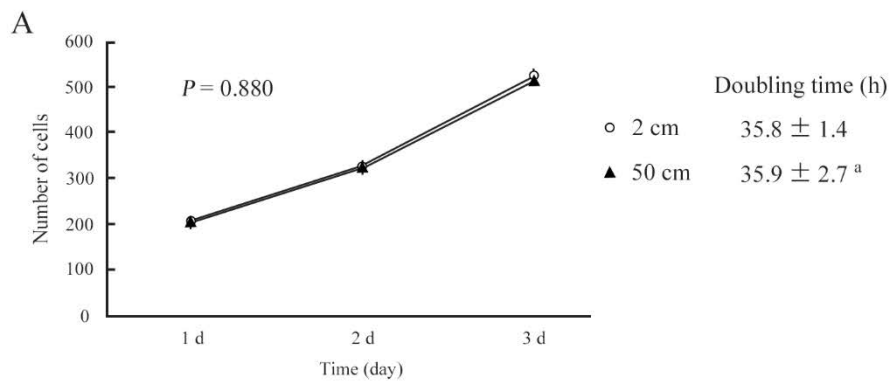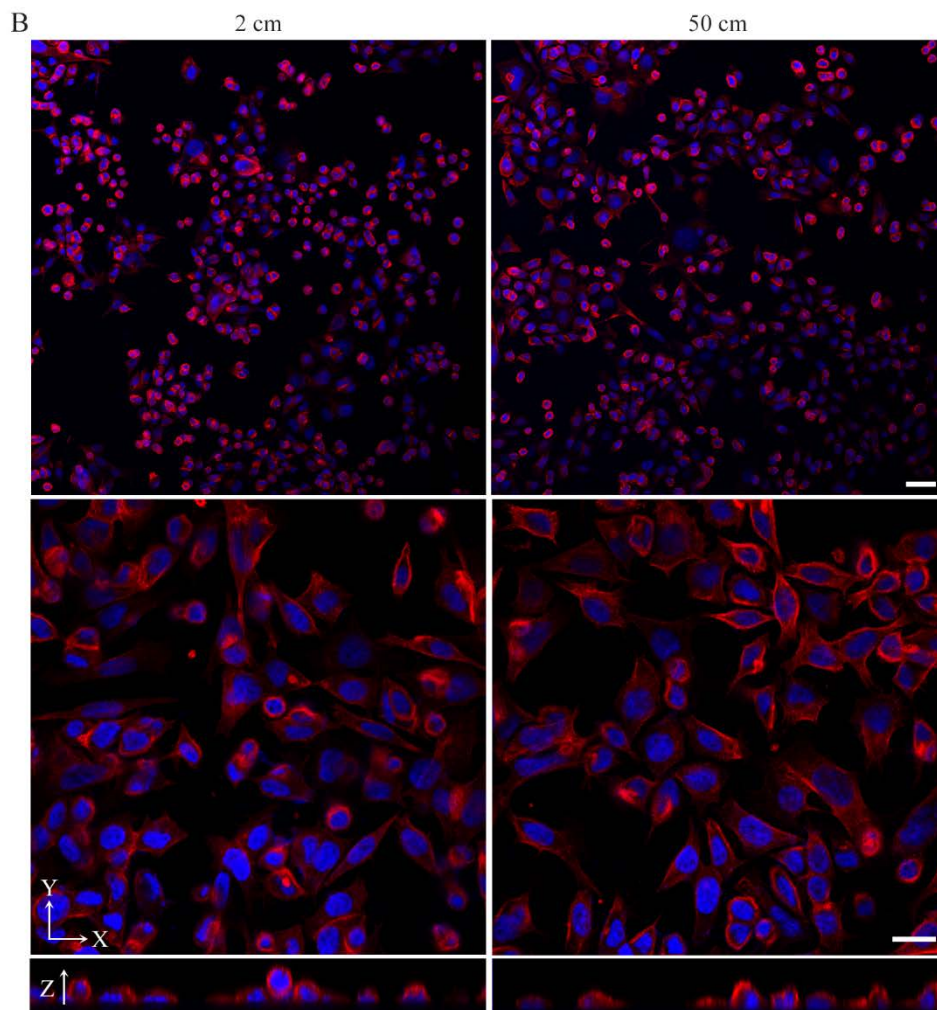

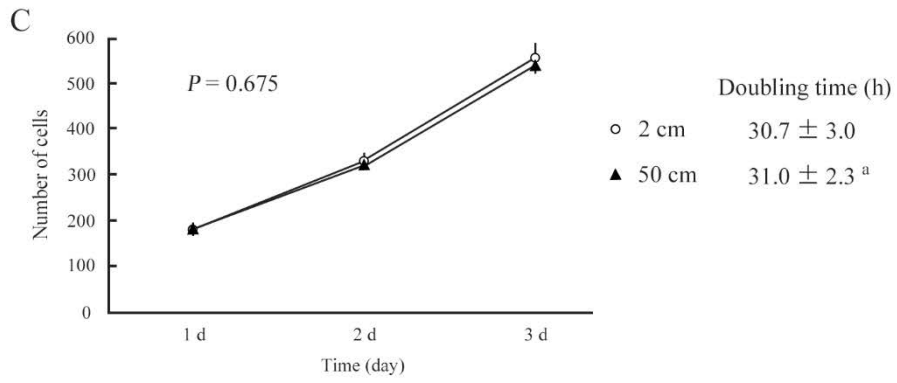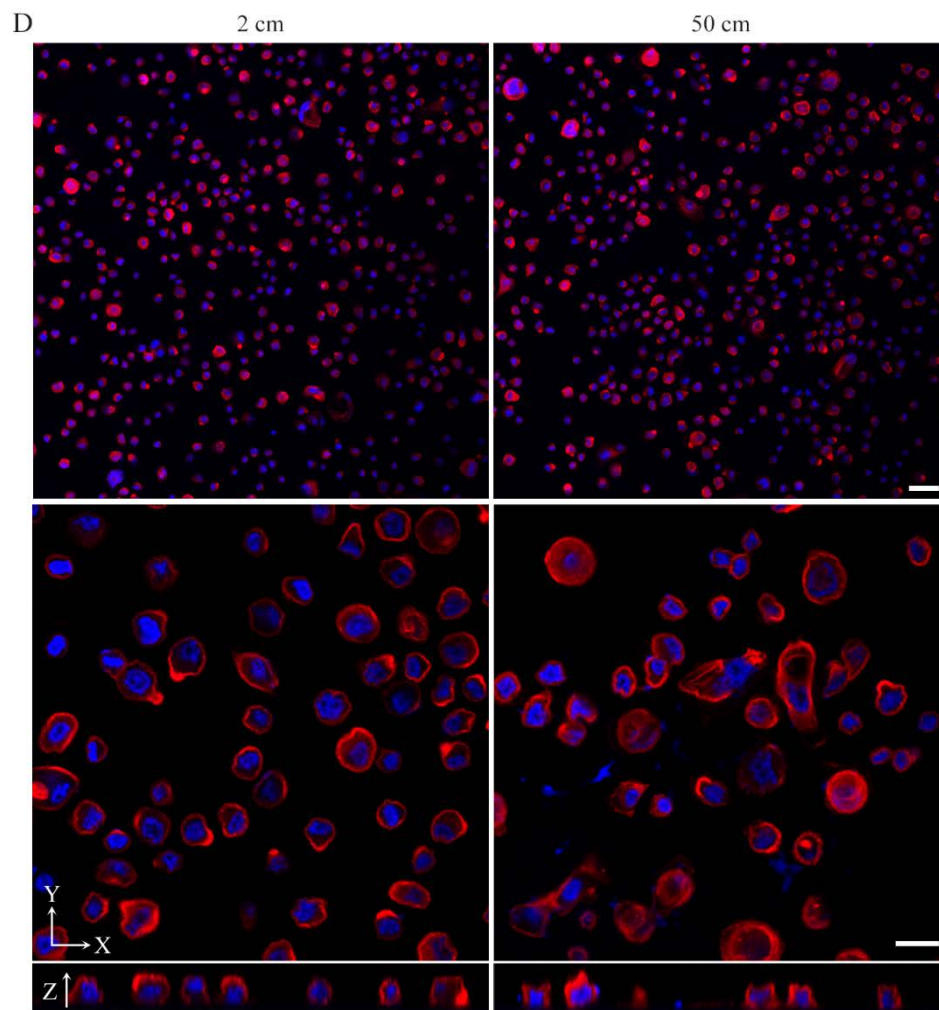



**Figure S3. Cell growth and cell morphological analyses of KATO-III and NUGC-4 cells.**

KATO-III (A and B) or NUGC-4 (C and D) cells were cultured on a semipermeable membrane in 2- or 50-cm-high culture medium for 3 days. (A and C) Cell numbers were counted every day, and the means were plotted with error bars indicating standard deviations ( $n = 3$  per group for each experiment). The time-course plots of cell numbers were analyzed by ANOVA; the  $P$ -values are shown. Cell doubling time (mean  $\pm$  standard deviation, hour) was calculated from five independent experiments. <sup>a</sup>  $P > 0.8$  by Student's  $t$ -test when compared with 2-cm-high-medium cultures. After 3 days of culture, NIH3T3 cells were stained with a mixture of phalloidin (red) and DAPI (blue) (B and D). Scale bar = 20  $\mu\text{m}$ .

**Figure S4**

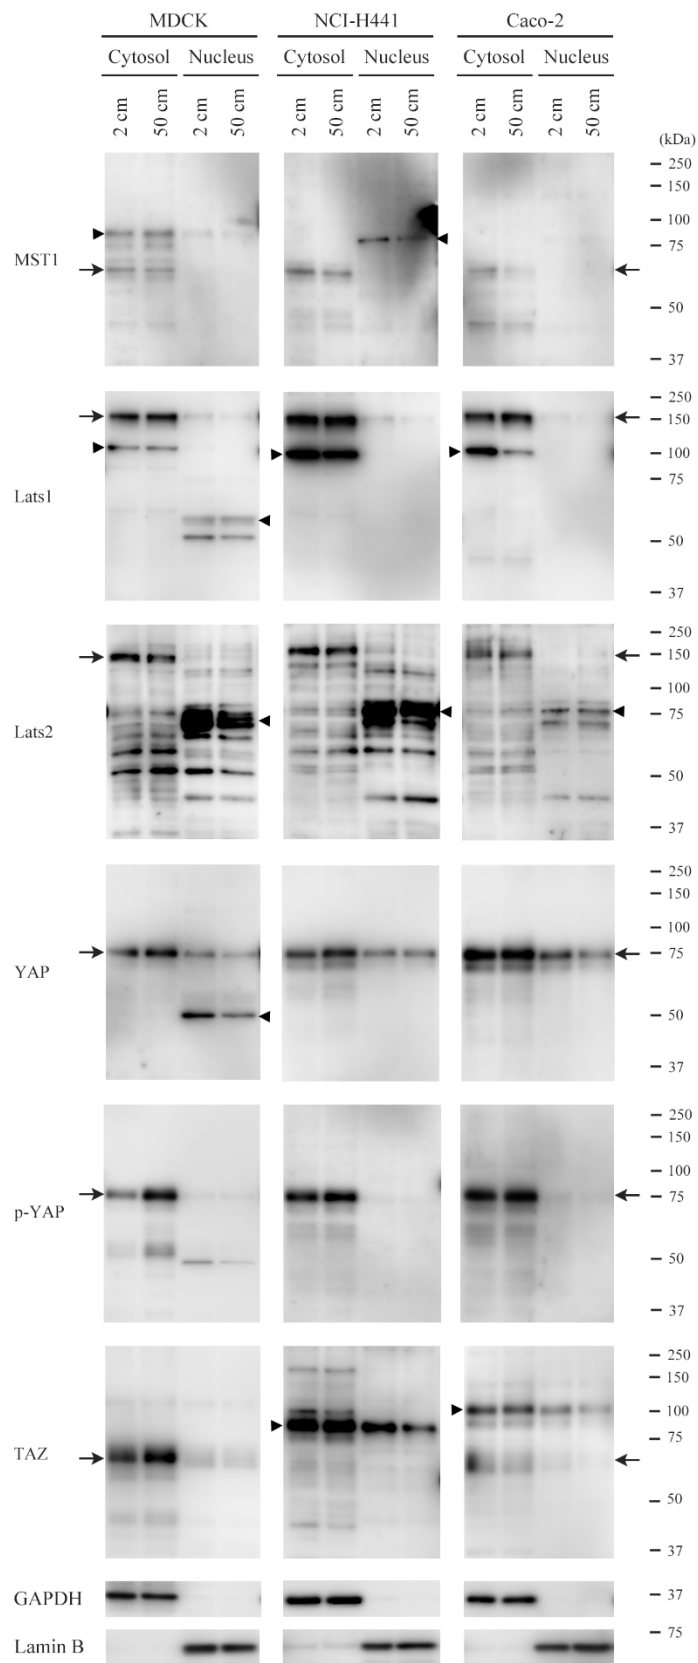

**Figure S4. Expression analyses of Hippo pathway molecules.**

MDCK, NCI-H441, and Caco-2 cells were cultured on a semipermeable membrane in 2- or 50-cm-high medium for 3 days. Cytosolic and nuclear proteins were separately extracted from the cells, and were blotted with the antibodies indicated. The original images of Figure 3 of the main text are shown. Arrows indicate the relevant bands for the individual antibodies, while arrowheads indicate noisy non-specific bands.

**Figure S5**

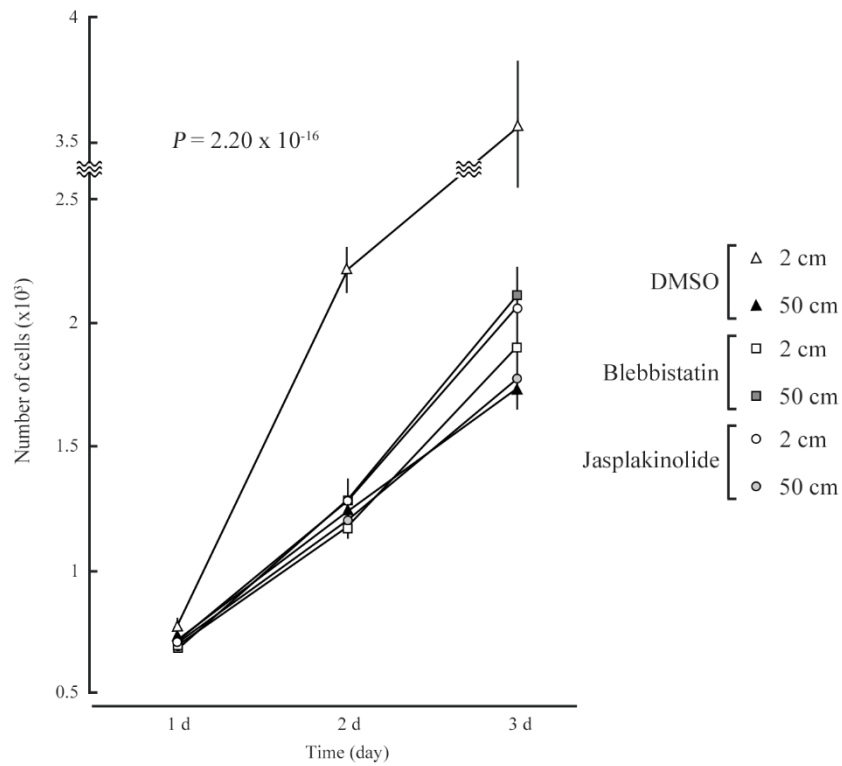

**Figure S5. Cell growth analyses of MDCK cells in the presence of pharmacological agents.**

MDCK cells were cultured in 2- or 50-cm-high medium containing blebbistatin (20  $\mu$ M), jasplakinolide (20 nM) or DMSO (7,500 $\times$  dilution) for 3 days. Cell numbers were counted every day, and the means were plotted with error bars indicating standard deviations ( $n = 3$  per group). The time-course plots of cell numbers were analyzed by ANOVA; the  $P$ -values are shown.

**Table S1** Top 10 up- or down-regulated genes in 2 cm versus 50 cm

| Gene name (Symbol)                                                          | Fold change |
|-----------------------------------------------------------------------------|-------------|
| <b>Upregulated</b>                                                          |             |
| Keratin 14 ( <i>KRT14</i> )                                                 | 11.869      |
| ADAM DEC1 precursor ( <i>ADANDEC1</i> )                                     | 6.272       |
| Golgin subfamily A member 7B ( <i>GOLGA7B</i> )                             | 5.488       |
| Cytochrome C oxidase subunit 7A1, mitochondrial precursor ( <i>COX7A1</i> ) | 4.940       |
| Follistatin precursor ( <i>FST</i> )                                        | 4.761       |
| Orexin precursor ( <i>HCRT</i> )                                            | 4.611       |
| Canalicular multispecific organic anion transporter 1 ( <i>ABCC2</i> )      | 4.584       |
| Antileukoproteinase precursor ( <i>SLPI</i> )                               | 4.391       |
| E3 ubiquitin-protein ligase CCNB1IP1 ( <i>CCNB1IP1</i> )                    | 4.380       |
| Protein INCA1 isoform 1 ( <i>INCA1</i> )                                    | 4.338       |
| <b>Downregulated</b>                                                        |             |
| Yang-like protein 2 ( <i>VANGL2</i> )                                       | -5.466      |
| DC-STAMP domain-containing protein 1 ( <i>DCST1</i> )                       | -5.467      |
| Izumo sperm-egg fusion protein 4 precursor ( <i>IZUMO4</i> )                | -5.468      |
| Unconventional myosin-Vc ( <i>MYO5C</i> )                                   | -5.694      |
| Dynein assembly factor 3, axonemal ( <i>DNAAF3</i> )                        | -5.770      |
| Atypical chemokine receptor 3 ( <i>CXCR7</i> )                              | -5.782      |
| Melanocyte-stimulating hormone receptor ( <i>MC1R</i> )                     | -6.377      |
| Fibrinogen-like protein 1 precursor ( <i>FGL1</i> )                         | -6.378      |
| Radial spoke head protein 9 homolog ( <i>RSPH9</i> )                        | -7.288      |
| Rhombotin-1 ( <i>LMO1</i> )                                                 | -7.288      |

**Table S2** Gene categories significantly altered in 2 cm versus 50 cm

| Gene category                                                            | Genes (n) | <i>P</i> -value     |
|--------------------------------------------------------------------------|-----------|---------------------|
| <b>Upregulated</b>                                                       |           |                     |
| AP-1 transcription factor network                                        | 4         | 7.10E <sup>-6</sup> |
| Validated transcriptional targets of AP1 family members<br>Fra1 and Fra2 | 3         | 2.50E <sup>-5</sup> |
| Genes involved in GPCR ligand binding                                    | 7         | 3.30E <sup>-5</sup> |
| Trk receptor signaling mediated by PI3K and PLC-gamma                    | 3         | 8.70E <sup>-5</sup> |
| PI3K Pathway                                                             | 3         | 9.50E <sup>-5</sup> |
| Complement and coagulation cascades                                      | 3         | 0.0002              |
| Cytokine-cytokine receptor interaction                                   | 5         | 0.0004              |
| Validated targets of C-MYC transcriptional repression                    | 3         | 0.0004              |
| Jak-STAT signaling pathway                                               | 4         | 0.0005              |
| Genes involved in ABC-family proteins mediated transport                 | 2         | 0.0006              |
| O-Glycan biosynthesis                                                    | 2         | 0.0007              |
| Genes involved in G alpha (q) signalling events                          | 4         | 0.0007              |
| Focal adhesion                                                           | 4         | 0.0009              |
| Calcium signaling in the CD4+ TCR pathway                                | 2         | 0.0009              |
| ABC transporters                                                         | 2         | 0.0009              |
| Glucocorticoid receptor regulatory network                               | 3         | 0.001               |
| Validated transcriptional targets of deltaNp63 isoforms                  | 2         | 0.0011              |
| Genes involved in Gastrin-CREB signalling pathway via<br>PKC and MAPK    | 4         | 0.0011              |
| Hematopoietic cell lineage                                               | 3         | 0.0011              |
| p38 signaling mediated by MAPKAP kinases                                 | 2         | 0.0011              |
| Alpha9 beta1 integrin signaling events                                   | 2         | 0.0013              |
| Genes related to Wnt-mediated signal transduction                        | 3         | 0.0013              |
| Prion diseases                                                           | 2         | 0.0014              |
| Genes involved in Post-translational protein modification                | 3         | 0.0018              |
| Genes involved in Extracellular matrix organization                      | 2         | 0.0023              |
| Calcineurin-regulated NFAT-dependent transcription in<br>lymphocytes     | 2         | 0.0023              |
| Genes involved in O-linked glycosylation of mucins                       | 2         | 0.0025              |
| Regulation of retinoblastoma protein                                     | 2         | 0.0035              |

|                                                                |   |        |
|----------------------------------------------------------------|---|--------|
| Bladder cancer                                                 | 2 | 0.0036 |
| Genes involved in Cytokine Signaling in Immune system          | 4 | 0.0036 |
| Viral myocarditis                                              | 2 | 0.0036 |
| BMP receptor signaling                                         | 1 | 0.0049 |
| Fas Signaling Pathway                                          | 2 | 0.0049 |
| a6b1 and a6b4 Integrin signaling                               | 2 | 0.0058 |
| Genes involved in Interferon Signaling                         | 2 | 0.0058 |
| Genes involved in Apoptotic cleavage of cell adhesion proteins | 1 | 0.0067 |
| Fc epsilon RI signaling pathway                                | 2 | 0.0072 |
| Sprouty regulation of tyrosine kinase signals                  | 1 | 0.0079 |
| SHP2 signaling                                                 | 2 | 0.0081 |
| Neurotrophic factor-mediated Trk receptor signaling            | 2 | 0.0087 |
| Chemokine signaling pathway                                    | 2 | 0.0088 |
| Syndecan-4-mediated signaling events                           | 1 | 0.0089 |
| Genes involved in Innate Immune System                         | 3 | 0.0097 |
| Pancreatic cancer                                              | 2 | 0.0097 |
| TGF-beta signaling pathway                                     | 1 | 0.0099 |

### **Downregulated**

|                                                                           |    |                      |
|---------------------------------------------------------------------------|----|----------------------|
| Genes involved in Cholesterol biosynthesis                                | 7  | 4.70E <sup>-11</sup> |
| Genes involved in Metabolism of lipids and lipoproteins                   | 16 | 2.40E <sup>-7</sup>  |
| Steroid biosynthesis                                                      | 4  | 3.10E <sup>-6</sup>  |
| PPAR signaling pathway                                                    | 6  | 1.10E <sup>-5</sup>  |
| Genes involved in Complement cascade                                      | 3  | 7.20E <sup>-5</sup>  |
| Terpenoid backbone biosynthesis                                           | 3  | 8.30E <sup>-5</sup>  |
| Genes involved in Striated Muscle Contraction                             | 3  | 9.30E <sup>-5</sup>  |
| Intestinal immune network for IgA production                              | 4  | 0.0001               |
| Genes involved in Fatty acid, triacylglycerol, and ketone body metabolism | 7  | 0.0001               |
| Genes involved in Peptide ligand-binding receptors                        | 2  | 0.0002               |
| Genes involved in G alpha (s) signalling events                           | 6  | 0.0003               |
| Notch signaling pathway                                                   | 3  | 0.0004               |
| Genes involved in Class A/1 (Rhodopsin-like receptors)                    | 2  | 0.0005               |
| Genes involved in Muscle contraction                                      | 3  | 0.0005               |

|                                                                                                                       |    |        |
|-----------------------------------------------------------------------------------------------------------------------|----|--------|
| Genes involved in PPARA Activates Gene Expression                                                                     | 5  | 0.0006 |
| Genes involved in Highly calcium permeable postsynaptic nicotinic acetylcholine receptors                             | 2  | 0.0008 |
| Genes involved in G beta:gamma signalling through PI3Kgamma                                                           | 3  | 0.0009 |
| Genes involved in Transmembrane transport of small molecules                                                          | 10 | 0.0012 |
| Complement Pathway                                                                                                    | 2  | 0.0012 |
| Genes involved in G-protein beta:gamma signalling                                                                     | 3  | 0.0012 |
| Butanoate metabolism                                                                                                  | 2  | 0.0012 |
| Genes involved in Acetylcholine Binding And Downstream Events                                                         | 2  | 0.0012 |
| Genes involved in Pyruvate metabolism                                                                                 | 2  | 0.0019 |
| Genes involved in Glucagon-type ligand receptors                                                                      | 3  | 0.0019 |
| Genes involved in Signaling by NOTCH                                                                                  | 4  | 0.002  |
| Primary bile acid biosynthesis                                                                                        | 2  | 0.0021 |
| G alpha q Pathway                                                                                                     | 2  | 0.0022 |
| Genes involved in Transport of glucose and other sugars, bile salts and organic acids, metal ions and amine compounds | 4  | 0.0023 |
| Cardiac muscle contraction                                                                                            | 3  | 0.0023 |
| Genes involved in Facilitative Na <sup>+</sup> -independent glucose transporters                                      | 2  | 0.0024 |
| Genes involved in Platelet homeostasis                                                                                | 4  | 0.0026 |
| Genes involved in Opioid Signalling                                                                                   | 4  | 0.0027 |
| Genes involved in Synthesis of bile acids and bile salts                                                              | 2  | 0.003  |
| NFAT and Hypertrophy of the heart (Transcription in the broken heart)                                                 | 3  | 0.0036 |
| Genes involved in Neurotransmitter Receptor Binding And Downstream Transmission In The Postsynaptic Cell              | 5  | 0.0036 |
| Regulation of RhoA activity                                                                                           | 3  | 0.0037 |
| G alpha 13 Pathway                                                                                                    | 2  | 0.0038 |
| Genes involved in cGMP effects                                                                                        | 2  | 0.0038 |
| Genes involved in Class B/2 (Secretin family receptors)                                                               | 4  | 0.0042 |
| Neuroactive ligand-receptor interaction                                                                               | 5  | 0.0046 |
| Genes involved in Neuronal System                                                                                     | 7  | 0.0051 |



|                                                                                                       |   |        |
|-------------------------------------------------------------------------------------------------------|---|--------|
| Genes involved in Integration of energy metabolism                                                    | 4 | 0.0054 |
| Genes involved in Signaling by NOTCH1                                                                 | 3 | 0.0055 |
| Genes involved in ABCA transporters in lipid homeostasis                                              | 1 | 0.0058 |
| Genes involved in Bile acid and bile salt metabolism                                                  | 2 | 0.006  |
| Genes involved in Synthesis of PC                                                                     | 2 | 0.0062 |
| Genes involved in Potassium Channels                                                                  | 4 | 0.0065 |
| Genes involved in Chemokine receptors bind chemokines                                                 | 1 | 0.0065 |
| Genes related to IL4 rceptor signaling in B lymphocytes                                               | 2 | 0.0065 |
| Genes involved in Nitric oxide stimulates guanylate cyclase                                           | 2 | 0.0066 |
| Genes involved in Collagen formation                                                                  | 3 | 0.007  |
| Genes involved in Signaling by NOTCH3                                                                 | 1 | 0.0078 |
| Genes involved in Notch-HLH transcription pathway                                                     | 1 | 0.0078 |
| Genes involved in Receptor-ligand binding initiates the second proteolytic cleavage of Notch receptor | 1 | 0.0078 |
| Genes involved in Activated NOTCH1 Transmits Signal to the Nucleus                                    | 2 | 0.0083 |
| Natural killer cell mediated cytotoxicity                                                             | 3 | 0.0083 |
| Genes involved in Prostacyclin signalling through prostacyclin receptor                               | 2 | 0.0088 |
| Cytokines and Inflammatory Response                                                                   | 2 | 0.0093 |
| Melanogenesis                                                                                         | 1 | 0.0094 |
| Genes involved in G beta:gamma signalling through PLC beta                                            | 2 | 0.0098 |

---
